# Supplementary material for: Targeted Deletion of a Plasmodium Site-2 Protease Impairs Life Cycle Progression in the Mammalian Host
Source: PubMed Central journal article supplement (PMC5249076; doi:10.1371/journal.pone.0170260), 2017-01-20
Supplement: pone.0170260.s001.pdf [file pone.0170260.s001.pdf]

|                | 1                                   | 10                           | 20                                            |
|----------------|-------------------------------------|------------------------------|-----------------------------------------------|
| P.berghei      | M TSRNIISY                          | FNDVQTEKKQ                   | LSSNWL                                        |
| P.vivax        | MDPKNHVLF                           | CSNALMEHRR                   | VASNFL                                        |
| P.yoelii       | M TSRNIISY                          | FNNVQTEKKQ                   | LSSNWL                                        |
| P.chabaudi     | M TPRNIISY                          | FNDVQTEKKQ                   | LSSNWL                                        |
| P.cynomolgi    | MDPKNNMFF                           | CSNTLMEHRR                   | VASNFL                                        |
| P.falci-parum  | M GSRNKMLL                          | YNNALMEHKR                   | LASSFL                                        |
| P.knowlesi     | MDPKNNMFF                           | CSNTRMENRR                   | LGSNYL                                        |
| P.reichenowi   | M GSRNKMLL                          | YNNALMEHKR                   | LASSFL                                        |
| T.gondii       | M S GAVRIDARG                       | MI IREGEDPELGRPLRSAAESHATDLR | ASGRTLEQRQVSTRSS                              |
| N.caninum      | MAGSVRIDARG                         | MPF                          |                                               |
| H.hammondi     | M S GAVRIDARG                       | MI IREGQDPELGRPLHSAPESHAADLQ | ASGRTLDQRQVSTRSS                              |
| E.tenella      | M A P Q P Q G G G                   | PRITA.TG                     | DIIWP.GPNPSTRQQGLALPLA                        |
| A.thaliana     | M E I S G R R M R R F               | RM                           | RFRRDHLTGG.E                                  |
| E.coli         | M L S F L                           |                              |                                               |
| M.tuberculosis | M M F V                             |                              |                                               |
| B.subtilis     | M F V N                             |                              |                                               |
| H.sapiens      | M I P V S L V V V V V G G W T V V Y | L T D . . . L V L K . . . .  | S S V Y F K H S Y E D W L E N N G L S I S P F |
| D.melanogaster | M D P F V F F I V L A S L Y G V L Y | F F D . . . R F F K . . . .  | S C M H Y . P Y D A F L K N T G L S I N F M   |

|                | 30                                                      | 40                                                    |              |
|----------------|---------------------------------------------------------|-------------------------------------------------------|--------------|
| P.berghei      | L I H N E K S Y W D H K D                               | Q S                                                   |              |
| P.vivax        | P T Y R E K S Y D Y E R H                               | Q D                                                   |              |
| P.yoelii       | L I D N E K S Y W D Y K R                               | Q S                                                   |              |
| P.chabaudi     | L I H N E K S Y Q D Y K H                               | Q S                                                   |              |
| P.cynomolgi    | S M S R E K S Y A Y E R H                               | Q D                                                   |              |
| P.falci-parum  | S V Y K E K A Y N Y E K C                               | Q N                                                   |              |
| P.knowlesi     | Y M W R E K S Y D Y E K H                               | P D                                                   |              |
| P.reichenowi   | S V Y K E K G Y N Y E K C                               | Q N                                                   |              |
| T.gondii       | Q P R G S I L                                           | G C L R R T F V R P F C C F P D A A G                 | AR . . . . P |
| N.caninum      |                                                         | C C F P D A A A                                       | SR . . . . P |
| H.hammondi     | R P R G S I L                                           | G C L R R T F V R P F C C F P D A A A                 | AR . . . . P |
| E.tenella      | A G G Q Q Q Q Q                                         |                                                       |              |
| A.thaliana     | N I E N E A S                                           | C C Y C D L K I S N F N E P I F R L G R R F S G V L K |              |
| E.coli         |                                                         |                                                       |              |
| M.tuberculosis |                                                         |                                                       |              |
| B.subtilis     |                                                         |                                                       |              |
| H.sapiens      | H I R W Q T A V E N R A F Y S W G R R K A               | R M L                                                 | Y            |
| D.melanogaster | S L H W H T S A F N R T L L R W G S A G N S C T R R V M |                                                       | I            |

|                | 50                          | 60                                                        | 70                    | 80                            |
|----------------|-----------------------------|-----------------------------------------------------------|-----------------------|-------------------------------|
| P.berghei      | Y L S F I L S L L P L       | F L I S V I H L S I I L N G Y Y I G H L F L T I S Y L L S |                       |                               |
| P.vivax        | V V S L I L S M L P L       | L M T S V I H L L I K T N G Y Y I G N L F L M I T Y L F S |                       |                               |
| P.yoelii       | Y L S F I L S L L P L       | F L I S V I H L S I I L N G Y Y I G H L F L T I S Y L L S |                       |                               |
| P.chabaudi     | Y L S L I L S L L P L       | F L I S V I H L S I T M N G Y Y I G H L F L T I S Y L L S |                       |                               |
| P.cynomolgi    | G V S F I L S L F P L       | L I I S G V H L W I K T N G Y Y I G N L F L M I T Y F F S |                       |                               |
| P.falci-parum  | C L S Y F L S L V P L       | L I V G G I H L F I K M N G Y Y I G N L F L T I T Y L F S |                       |                               |
| P.knowlesi     | V L S F I L S M V P L       | L I V I V V H L L I N T N G Y Y I G N L F L M I T Y L F S |                       |                               |
| P.reichenowi   | C L S Y F L S L V P L       | L I V G G I H L F I K M N G Y Y I G N L F L T I T Y L F S |                       |                               |
| T.gondii       | E G A Y T G F . . W         | L P P I L G L A P I F W L T I . . . . .                   | F A A . I . . . . .   |                               |
| N.caninum      | E G A Y D A C . . W         | V P P I L G L A P V F W L T I . . . . .                   | F A T . I . . . . .   |                               |
| H.hammondi     | E G A Y T G F . . W         | L P P F L G L A P I F W L T I . . . . .                   | F A A . I . . . . .   |                               |
| E.tenella      | . . . Q Q . . . . G         |                                                           |                       |                               |
| A.thaliana     | V W F S I G L G F . . . . . | G V A S L I L . . . . .                                   | V . . . . .           |                               |
| E.coli         |                             |                                                           |                       |                               |
| M.tuberculosis |                             |                                                           |                       |                               |
| B.subtilis     |                             |                                                           |                       |                               |
| H.sapiens      | Q W F N F G M V F G         | V I A M F . . . . .                                       | S S F F L L . . . . . | G K T . L M Q T L A Q M M A D |
| D.melanogaster | T S F N V . . . . G         | V L V T F S L L P I                                       | G L I L L . . . . .   | I A T . I . . . . .           |



|                | 160                                   | 170          |
|----------------|---------------------------------------|--------------|
| P.berghei      | .....GIPGNLYWL                        | ..QLHFI      |
| P.vivax        | .....GLPGNLYWI                        | ..QLHFI      |
| P.yoelii       | .....GIPGNLYWL                        | ..QLHFI      |
| P.chabaudi     | .....GIPGNLYWL                        | ..QLHFI      |
| P.cynomolgi    | .....GLPGNLYWL                        | ..QLHFI      |
| P.falciparum   | .....GIPGNLYWL                        | ..QLHFI      |
| P.knowlesi     | .....GLPGNLYWL                        | ..QLHFI      |
| P.reichenowi   | .....GIPGNLYWL                        | ..QLHFI      |
| T.gondii       | .....ALPGAAVLI                        | ..QHENL      |
| N.caninum      | .....ALPGAAVTI                        | ..QHSSL      |
| H.hammondi     | .....ALPGAAVMI                        | ..QHENL      |
| E.tenella      | .....VLPGRVNI                         | ..DERAV      |
| A.thaliana     | .....GLVAF                            | ..DNDV       |
| E.coli         | .....                                 | ..LRHHAFNN   |
| M.tuberculosis | .....TPVEELDP                         | DERDRAM      |
| B.subtilis     | IEVETADLEHDMKITGYEQGKEDELSSFTVSETSFFI | VDGEEVQI     |
| H.sapiens      | .....                                 | ..THLQL      |
| D.melanogaster | .....                                 | ..DHLNSLRWFR |

|                | 180         | 190                               |
|----------------|-------------|-----------------------------------|
| P.berghei      | LSFIFLSGPI  | SDI LYI LIFVFF                    |
| P.vivax        | LSFIYLSGPI  | SDI LCI LLIVFF                    |
| P.yoelii       | LSFIFLSGPI  | SDI LYI LIFVFF                    |
| P.chabaudi     | LSFIFLSGPI  | SDI LYI LIFVFF                    |
| P.cynomolgi    | LSFIYLSGPI  | SDI LCI LVIVFF                    |
| P.falciparum   | LSFIFLSGPI  | SDI LYI LFIVFF                    |
| P.knowlesi     | MSFIYLSGPI  | SDI LCI LVIVFF                    |
| P.reichenowi   | LSFIFLSGPI  | SDI LYI LFIVFF                    |
| T.gondii       | RTLTAALAGPL | ATFLSGLLFSGL                      |
| N.caninum      | KTLTAALAGPL | ANLLCGFLFSGL                      |
| H.hammondi     | RTLTAALAGPL | ATFLSGLLFSGL                      |
| E.tenella      | KTATAALAGP  | ATNLLLGMLGSFC                     |
| A.thaliana     | ALRIYCAGIW  | HNAVFCALCVFALFLLPVMLSP            |
| E.coli         | RAAIIAAGP   | VANFIFAIFAYWLVFI                  |
| M.tuberculosis | RVAVLFAAGP  | GMNLAICLVLIYAIALV                 |
| B.subtilis     | RIKAIAAGP   | IMNFILAYVILVMLGLI                 |
| H.sapiens      | QLRIIFCAGI  | WHNFVLA LLGILALVLLPVILLPFYVTGVGVL |
| D.melanogaster | KLRVLCAGI   | WHNFV FAGV CY                     |

|                |                                                             |
|----------------|-------------------------------------------------------------|
| P.berghei      | .....                                                       |
| P.vivax        | .....                                                       |
| P.yoelii       | .....                                                       |
| P.chabaudi     | .....                                                       |
| P.cynomolgi    | .....                                                       |
| P.falciparum   | .....                                                       |
| P.knowlesi     | .....                                                       |
| P.reichenowi   | .....                                                       |
| T.gondii       | .....                                                       |
| N.caninum      | .....                                                       |
| H.hammondi     | .....                                                       |
| E.tenella      | .....                                                       |
| A.thaliana     | .....                                                       |
| E.coli         | NSIAAEAQIAPGTELKAVDGIETPDWDAVRLQLVDKIGDESTTITVAPFGSDQRRDVKL |
| M.tuberculosis | ETGCVAQEVS                                                  |
| B.subtilis     | .....                                                       |
| H.sapiens      | .....                                                       |
| D.melanogaster | .....                                                       |

P.berghei .....  
 P.vivax .....  
 P.yoelii .....  
 P.chabaudi .....  
 P.cynomolgi .....  
 P.falciparum .....  
 P.knowlesi .....  
 P.reichenowi .....  
 T.gondii .....  
 N.caninum .....  
 H.hammondi .....  
 E.tenella .....  
 A.thaliana ..... SVSPLFG..YLSPGDVIVSLDGIQ  
 E.coli DLRHWAFEPDKEDPVSSLGIRPRGPQIEPVLENVQPNS.AASKAGLQAGDRIVKVDGQP  
 M.tuberculosis ..... QGKLEQCTGPG.PAALAGIRSGDVVVKVDTP  
 B.subtilis ..... DNG.RAAEAGLKEGDYIQSINGEK  
 H.sapiens ..... EDSPAIGPRGLFVGDVTLVTHLQDCP  
 D.melanogaster ..... RKSPLRGERGLQVDNQITQVNGCF

P.berghei .....  
 P.vivax .....  
 P.yoelii .....  
 P.chabaudi .....  
 P.cynomolgi .....  
 P.falciparum .....  
 P.knowlesi .....  
 P.reichenowi .....  
 T.gondii .....  
 N.caninum .....  
 H.hammondi .....  
 E.tenella .....  
 A.thaliana VHKPSEWLELAAI.LDKENSKTSNGSLYLGGSSRRFHHGKGYCVPI.....SLI  
 E.coli LTQ...WVTFVML.VRDNPG.....KSLALEIERQGSPLSLTLI  
 M.tuberculosis VSS...FDEMAAA.VRKSHG.....SVPIVVERDGTAIIVTYVD  
 B.subtilis MRS...WTDIVSA.VKENPE.....KEMDVAVKRDNKTTLHISVT  
 H.sapiens VTNVQDWNECLDT.IAYEPQ.....IGYCISA.....STL  
 D.melanogaster VNSEESWVTCLQNSLKL..K.....PGYCVSA.....DFV

P.berghei .....  
 P.vivax .....  
 P.yoelii .....  
 P.chabaudi .....  
 P.cynomolgi .....  
 P.falciparum .....  
 P.knowlesi .....  
 P.reichenowi .....  
 T.gondii .....  
 N.caninum .....  
 H.hammondi .....  
 E.tenella .....  
 A.thaliana E.EGYK....GKMVENQFVCPGDLT....AFRTMPC.....SNAAIR.....E  
 E.coli P.....ES.K.....PG..NGKAIGFV.  
 M.tuberculosis I.....ESTQRWIPNGQGGELOPATVGAJ.  
 B.subtilis P.....EAVK.....DE..NKKTIGRF.  
 H.sapiens QQLSFPVRA..YKRLDGSTECNNHSLTDVCF...SY.....RNNFNK..RL.....  
 D.melanogaster Q.LNDESSAISHHSIDGQLQCCDELNPNVSCF...EV.....VEDANG..DVPVELP

P.berghei .....  
 P.vivax .....  
 P.yoelii .....  
 P.chabaudi .....  
 P.cynomolgi .....  
 P.falci-parum .....  
 P.knowlesi .....  
 P.reichenowi .....  
 T.gondii .....  
 N.caninum .....  
 H.hammondi .....  
 E.tenella .....  
 A.thaliana VSVCLD.....AKD.IVKLQKCGDGVVTTSDTDNQSDC.....VCPQGDLC LQ  
 E.coli .GIEPKVIPLPDEYKVVVRQYGFNAI.....VEATDKTWQLMK.....  
 M.tuberculosis .GVGAARVGP.....VRYGVFSAM.....PATFAVTGDLTVEVGK..ALA.  
 B.subtilis .GSYA...P.....TEKGVLSAV.....AYGATSTVDVTK.....  
 H.sapiens .HTCLP.....ARK.AVEAT.....QV.CRTNKDCKKSSSSS.FCII  
 D.melanogaster QHVCLN.....VRR.TLEEV.....SEHCSSG.....VCNEG.FCLR

P.berghei .....  
 P.vivax .....  
 P.yoelii .....  
 P.chabaudi .....  
 P.cynomolgi .....  
 P.falci-parum .....  
 P.knowlesi .....  
 P.reichenowi .....  
 T.gondii .....  
 N.caninum .....  
 H.hammondi .....  
 E.tenella .....  
 A.thaliana A.MQSPGVLWT.EITYKRT.SSQDCSRLGLDFNTSNCLGTFVVFVGD LIAM...SHSVHL  
 E.coli LT....VSM LG...KLITG.DV.....KLNNLSGPISIAKGAGMTAE  
 M.tuberculosis ALPTK.VGALV..RAIGGQR.....DPQTPISVVGASII..GGDTVDH  
 B.subtilis AI....LTNLS...KLVTG.QF.....KLDMLSGPVGIIYDMDTDQVAK  
 H.sapiens PS...LEHTT.RLIKVKH.PPQ.....IDMLYVGHPLHL...HYTVSI  
 D.melanogaster PL....IRNITAIMTFKRQ.NFR.....GEKLPPIVYVGHPPWDV...TRTVEV

|                | 200                       | 210     | 220        | 230           | 240       | 250              |
|----------------|---------------------------|---------|------------|---------------|-----------|------------------|
| P.berghei      | ...YN..MYTFFKNNIKFNVKPHP  | ALF...  | ISLATS     | ISFLVESF      | LLNIC     | PI LGF DGWGV     |
| P.vivax        | ...YN..FYSYVRNSKNLSVQPHS  | ILF...  | ISLATA     | ASFLVDSF      | LLNIC     | PI LGF DGWGI     |
| P.yoelii       | ...YN..MYTFLKNNKKNLNVNPHP | ALF...  | ISLATS     | ISFLVESF      | LLNIC     | PI LGF DGWGV     |
| P.chabaudi     | ...YN..MYKFFKNNKKNFNVKPHP | ALF...  | ISLATS     | ISFLVESF      | LLNIC     | PI LGF DGWGI     |
| P.cynomolgi    | ...YN..FYAYFKNNKKNLSVQPHS | ILF...  | ISLATA     | ASFLVDSF      | LLNIC     | PI LGF DGWGI     |
| P.falci-parum  | ...YN..LYSYFKNHKNLNVQPHS  | ILF...  | ISLATA     | VSFLVDSF      | LLNIC     | PI LGF DGWGI     |
| P.knowlesi     | ...YN..FYSYFKNSKNLSAQPHS  | ILL...  | ISLATA     | ASVLVDSF      | LLNIC     | PI LGF DGWGI     |
| P.reichenowi   | ...YN..LYSYFKNHKNLNVQPHS  | ILF...  | ISLATA     | VSFLVDSF      | LLNIC     | PI LGF DGWGI     |
| T.gondii       | ...LH..LSL.LSADYY....YT   | ILH...  | MGLACL     | IYFEAMSFI     | INMI      | PLPPLDGWAA       |
| N.caninum      | ...LR..LTL.LSVDYY....YT   | VLH...  | MGLACL     | IYFESMSVI     | INMI      | PLPPLDGWAA       |
| H.hammondi     | ...LH..LSL.LSADYY....YT   | VLH...  | MGLACL     | IYFEAMSFI     | INMI      | PLPPLDGWAA       |
| E.tenella      | ...VQ..VYIL.AASAN....PS   | IIP     | PLPIGLICFI | FLQFMSAVV     | LI        | PFPP.....        |
| A.thaliana     | TAYQPRWLFNFFGKSF.....PN   | ILLE... | RS         | LTCTFHVS      | LALVLLNSL | PVYYLDGESI       |
| E.coli         | LGVVY..Y.....             |         |            | LPFLALISVNLGI | INLF      | PI LPVL DGGHL    |
| M.tuberculosis | GLWVA..F.....             |         |            | WFFLAQLN      | LILAAINLL | PLL PFDGGHI      |
| B.subtilis     | TGIVN..L.....             |         |            | FQFAAFLS      | INLGLVNL  | PT PALDGGRL      |
| H.sapiens      | TSFIP..RFNFLSIDLP....VV   | VE      | T...       | FVKYLISLS     | GALAVNAV  | PCFALDQWVI       |
| D.melanogaster | SAFVP..RYSLLKAAWP....DA   | WL      | L...       | LKYNV         | VVFSIGLA  | LINAI PCFGFDGAHI |

|                |       |            |          |        |             |         |        |       |       |          |
|----------------|-------|------------|----------|--------|-------------|---------|--------|-------|-------|----------|
|                | 260   | 270        | 280      | 290    | 300         |         |        |       |       |          |
| P.berghei      | IEPYL | PYFLNDI    | INEEIV   | ..YNF  | LSY...VCPLL | VFIYFNF | IETKFF | FTK   | ITNY  | ILQD     |
| P.vivax        | VEPYL | PYCVNSL    | INEEIV   | ..NTY  | LSY...ICPLL | VFIYFNF | IETKYL | FTK   | IVNF  | ILLAR    |
| P.yoelii       | IEPYL | PYFLNDL    | INEEIV   | ..YNF  | LSY...VCPLL | VFIYFNF | IEAKFL | FTK   | ITNY  | ILQD     |
| P.chabaudi     | IEPYL | PCFLNDL    | INEEIV   | ..YNF  | LSY...VCPLL | VFIYFNF | IETKFL | FTK   | ITNY  | ILLQD    |
| P.cynomolgi    | LEPYL | PYCVNSL    | INEEIV   | ..NTY  | LSY...ICPLM | VFIYFNF | IETKYL | FTK   | IVNF  | ILLAR    |
| P.falciparum   | LEPYL | PYCLNNI    | INEEIV   | ..YTY  | LSY...ICPLL | VFIYFNF | IEARYL | FTR   | IVNF  | ILLAR    |
| P.knowlesi     | LEPYL | PYCLNTL    | INEEIV   | ..NTY  | LSY...ICPLL | VFIYFNF | IETKYL | FTR   | IVNF  | ILLGR    |
| P.reichenowi   | LEPYL | PYCLNNI    | INEEIV   | ..YTY  | LSY...ICPLL | VFIYFNF | IETRYL | FTR   | IVNF  | ILLAR    |
| T.gondii       | LEPWL | PHSC..FL   | LKKAM    | ..DPT  | LQR...IVPLL | VLAALFP | VFARVP | FFGH  | AVNV  | VAVT     |
| N.caninum      | LEPWL | PRSC..FL   | RKAME    | ..DPT  | LRR...ILPLF | VLAALFP | VFAKVP | FFGH  | AVNA  | VAVIT    |
| H.hammondi     | LEPWL | PHSC..FL   | LKKAM    | ..DPT  | LQR...IVPLL | VLAALFP | VFARVP | FFGH  | AVNV  | VAVT     |
| E.tenella      | ..... | .....      | .....    | .....  | .....       | .....   | .....  | ..... | ..... | .....    |
| A.thaliana     | LESSL | QSFTW..L   | SPRKK..K | KA     | LQVCLV      | GGSLLS  | FLAFFR | I     | F     | .....    |
| E.coli         | LFLA  | IEKIKGGP   | VSERV    | QD     | .....       | .....   | .....  | ..... | FCYR  | IGSILLVL |
| M.tuberculosis | AVAV  | FFERIRNMV  | RSARG    | KVAAAP | VNY         | .....   | LKL    | L     | PATYV | VVLVVG   |
| B.subtilis     | LFL   | FIEAIRGKPI | INRE     | KEA    | .....       | .....   | .....  | ..... | FVVF  | IGVAFLLM |
| H.sapiens      | LNS   | FLDATLTSV  | IGDND    | V..KDL | I           | GF      | .....  | ..... | FILL  | GGSVLLAA |
| D.melanogaster | TSTV  | IHSFLVGR   | V        | DQHA   | K..RDI      | ISL     | .....  | ..... | IITS  | VGSLLFAL |

|                |       |                   |                                |
|----------------|-------|-------------------|--------------------------------|
|                | 310   | 320               | 330                            |
| P.berghei      | LLG   | TAIDHAAFGADSFPTLY | SYLK.....KM                    |
| P.vivax        | ILG   | IEISHVTIGVSAFPTLY | AYLR.....NV                    |
| P.yoelii       | LLG   | TAIYHATFGADSFPTLY | SYLK.....KM                    |
| P.chabaudi     | LLG   | TAIYHAAFGADSFPTLY | SYLK.....KL                    |
| P.cynomolgi    | ILG   | IEISHVTIGVNAFPTLY | AYLR.....NV                    |
| P.falciparum   | ILG   | IELGHVTNGVNTFPTLY | SYLR.....KI                    |
| P.knowlesi     | ILG   | IEISHVTIGVNAFPTLY | FAYLR.....NV                   |
| P.reichenowi   | ILG   | IELGHVTNGVNTFPTLY | SYLR.....KI                    |
| T.gondii       | IFRA  | PPDLTPLAMQYFAPVY  | SQWRMHPIPVVDMRRASVSSSEFLEDFLQ  |
| N.caninum      | VFR   | APSDLTPLAMQYFAPVY | SQWRMHPIPVVDLRHAPA.STDFVEGFLLQ |
| H.hammondi     | IFRA  | PPDLTPLAMQYFALPY  | SQWRMHPIPVVDMRRASVSSSEFLEGFLPQ |
| E.tenella      | ..... | .....             | .....LE                        |
| A.thaliana     | LLGL  | P                 | .....LSRRW                     |
| E.coli         | LMGL  | .....ALFN         | .....DFSRL                     |
| M.tuberculosis | VT    | A                 | .....DLVN                      |
| B.subtilis     | LML   | V                 | .....VTWN                      |
| H.sapiens      | N     | .....V            | .....TLGL                      |
| D.melanogaster | A     | LLK               | .....V                         |
|                |       |                   | .....AWLS                      |
|                |       |                   | .....FLRPLL                    |

% Identity to P. berghei

|                 |        |
|-----------------|--------|
| P. yoelii       | 94.68% |
| P. chabaudi     | 92.81% |
| P. reichenowi   | 72.18% |
| P. falciparum   | 71.87% |
| P. vivax        | 69.68% |
| P. cynomolgi    | 69.06% |
| P. knowlesi     | 68.12% |
| E. tenella      | 25.13% |
| T. gondii       | 24.06% |
| N. caninum      | 23.93% |
| H. hammondi     | 23.43% |
| A. thaliana     | 14.06% |
| D. melanogaster | 12.50% |
| H. sapiens      | 11.56% |
| M. tuberculosis | 10%    |
| E. coli         | 8.43%  |
| B. subtilis     | 7.81%  |
