# Supplementary material for: Targeted Deletion of a Plasmodium Site-2 Protease Impairs Life Cycle Progression in the Mammalian Host
Source: PubMed Central journal article supplement (PMC5249076; doi:10.1371/journal.pone.0170260), 2017-01-20
Supplement: pone.0170260.s003.pdf [file pone.0170260.s003.pdf]

**Supplementary Table S1: Primers used in this study**

| <b>Experiment</b> | <b>Name</b>               | <b>Sequence (5' → 3')</b>      |
|-------------------|---------------------------|--------------------------------|
| Genotyping        | KD5For                    | GGTACCATGACTTCAAGAAATATAATATCA |
|                   | KD5Rev                    | AAGCTTATATAAATTTCTGGTATGC      |
|                   | KD3For                    | GATATCTTACAACCTGCATTTTATAAGA   |
|                   | KD3Rev                    | GGATCCTCACATTTTTTTGAGATATGAA   |
|                   | L695                      | ATGTCCATACAACCTATATCCGAAC      |
|                   | L665                      | GTTGAAAAATTAATAAAAAAAC         |
|                   | F1                        | CGAGCCATATTTGCCTTATTTTC        |
|                   | F2                        | GGATATATATGCATATAATAATGC       |
|                   | F3                        | GATTAGCATAGTTAAATAAAAAAAGTTG   |
| Expression data   | qS2P-F                    | CTTGGATTTGATGGATGGGG           |
|                   | qS2P-R                    | AAGAAGTGGACACACGTAAGA          |
|                   | qGFP-F                    | GATGGAAGCGTTCAACTAGCAGACC      |
|                   | qGFP-R                    | GCTGTTACAACTCAAGAAGGACC        |
|                   | qPbHsp70-F                | TGCAGCAGATAATCAAACCTC          |
|                   | qPbHsp70-R                | ACTTCAATTTGTGGAACACC           |
|                   | qmGAPDH-F                 | TGAGGCCGGTGCTGAGTATGTCTG       |
|                   | qmGAPDH-R                 | CCACAGTCTTCTGGGTGGCAGTG        |
|                   | Pb18S-F                   | AAGCATTAAATAAAGCGAATACATCCTTAC |
| Pb18S-R           | GGAGATTGGTTTTGACGTTTATGTG |                                |
